# Supplementary material for: Artificial Intelligence and Machine Learning Methods to Evaluate Cardiotoxicity following the Adverse Outcome Pathway Frameworks
Source: MDPI journal article supplement (doi:10.3390/toxics12010087), 2024-01-19
Supplement: s1 [file s1]

# Supplementary Materials: Artificial intelligence and machine learning methods to evaluate cardiotoxicity following the Adverse outcome pathway framework

Edoardo Luca Viganò, Davide Ballabio and Alessandra Roncaglioni

## Section S1: Machine Learning models and descriptors validation

### 1.1 MIE: Inhibition of mitochondrial complexes

Cross-validation for 10 splits

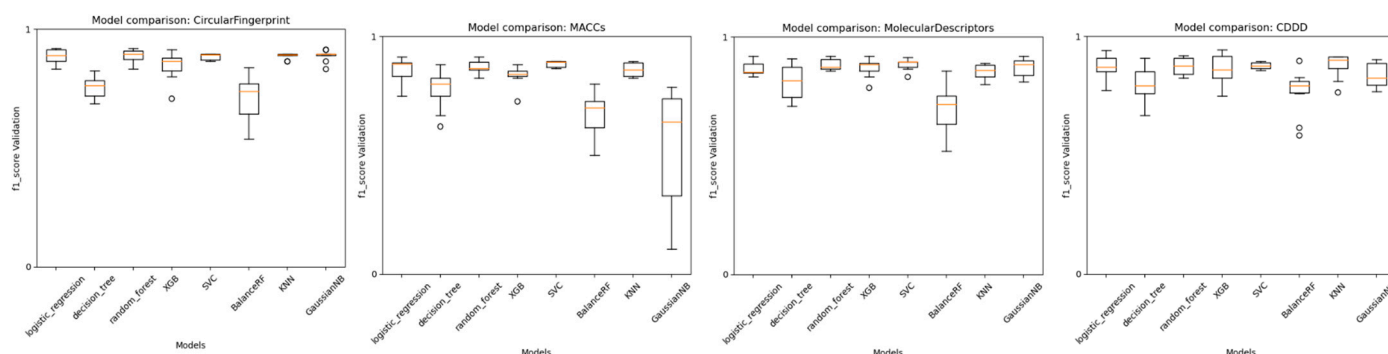

Figure S1: These box Plot figures represent a comparison, on 10-fold cross-validation, between different chemical descriptors, including Circular Fingerprint, MACCs, Mordred Molecular descriptors, and CDDD. The endpoint for the evaluation is the *Inhibition of mitochondrial complexes*. Different types of descriptors are used as input for various models reported in the title of each graph. The Median in cross-validation is reported in the orange row inside the boxplot.

The hyperparameter optimization was performed using grid search and the best model on the external test set is k-NN.

#### *inhibition of mitochondrial complexes*

Start calculation: kNN

Best hyperparameters: {'metric': 'manhattan', 'n\_neighbors': 3, 'weights': 'distance'}

balanced\_accuracy, 0.834

Total time taken: 0 minutes

Results External test set -----

{'Balance Accuracy': 0.721, 'Precision': 0.889, 'Sensitivity': 0.842, 'Specificity': 0.6, 'MCC': 0.415, 'f1': 0.865}

Number of preds: 24

Active preds: 18

### 1.2 KE1: Increase Oxidative Stress

## Cross-validation 10 split

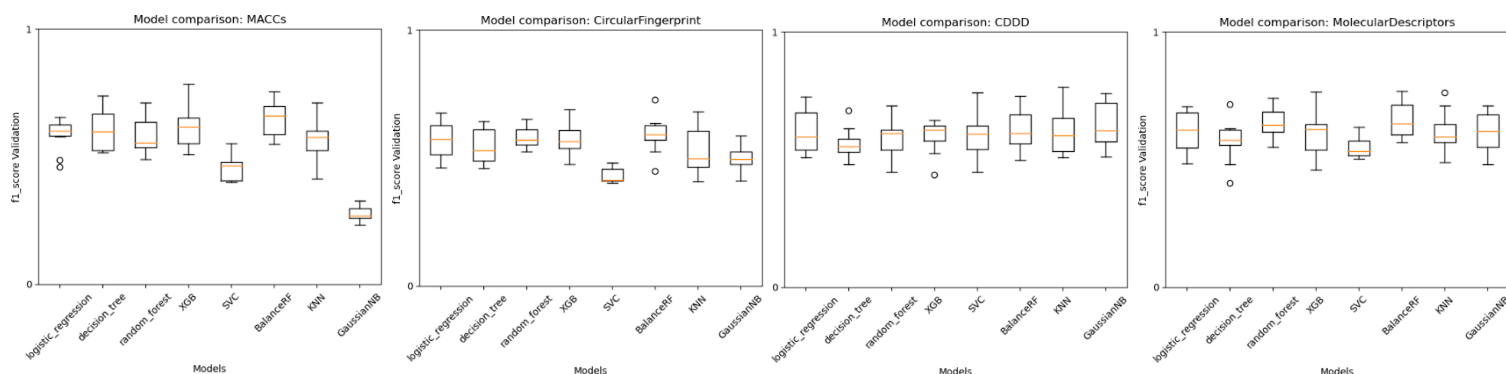

Figure S2: These box Plot figures represent a comparison, on 10-fold cross-validation, between different chemical descriptors, including Circular Fingerprint, MACCs, Mordred Molecular descriptors, and CDDD. The endpoint for the evaluation is the Increase Oxidative Stress Different types of descriptors are used as input for various models reported in the title of each graph. The Median in cross-validation is reported in the orange row inside the boxplot.

Cross-validation with Borderline-1 SMOTE oversampling using Molecular descriptors.

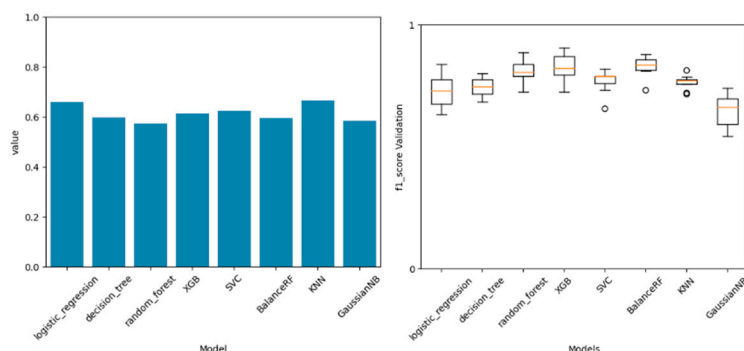

Figure S3: These figures represent results for (a) the cross-validation 10-fold and (b) the external test set. The types of ML models are reported on the x-axis. The training set used was oversampled in the minority class using SMOTE. The hyperparameter optimization was performed using grid search and the best model on the external test set is Logistic Regression.

### *Increase in Oxidative stress*

Start calculation: Logistic Regression

Best hyperparameters: {'C': 0.1, 'max\_iter': 100, 'penalty': 'l2', 'solver': 'saga'}

balanced\_accuracy, 0.723

Total time taken: 0 minutes

Results External test set -----

{'Balance Accuracy': 0.664, 'Precision': 0.448, 'Sensitivity': 0.684, 'Specificity': 0.645, 'MCC': 0.302, 'f1': 0.542}

Number of preds: 64

Active preds: 29

### 1.3 KE2: Mitochondrial Dysfunction

Cross-validation 10 split

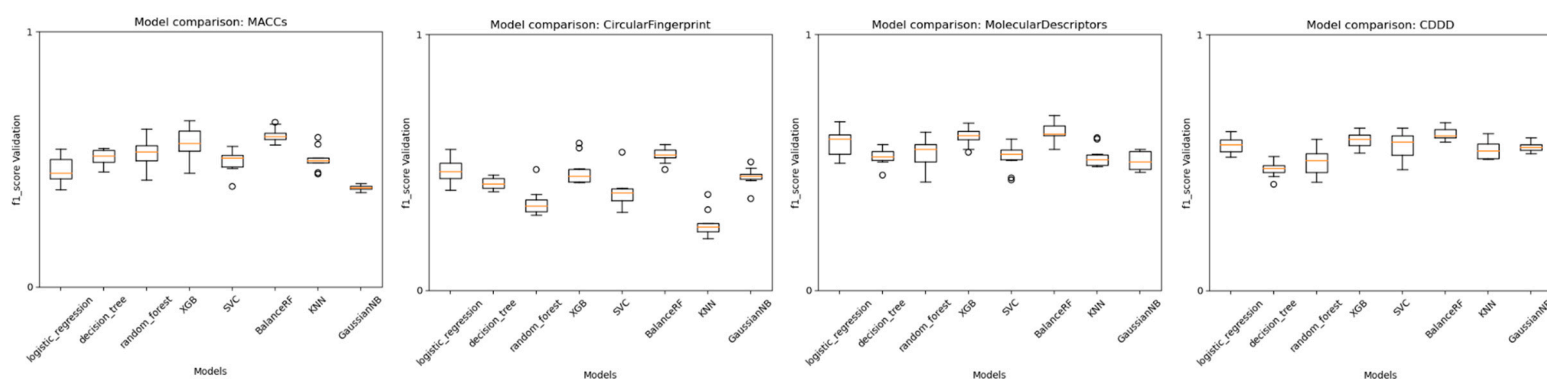

Figure S4: These box Plot figures represent a comparison, on 10-fold cross-validation, between different chemical descriptors, including Circular Fingerprint, MACCs, Mordred Molecular descriptors, and CDDD. The endpoint for the evaluation is *Mitochondrial Dysfunction*. Different types of descriptors are used as input for various models reported in the title of each graph. The Median in cross-validation is reported in the orange row inside the boxplot.

Cross-validation with SMOTE oversampling

To try to manage the unbalanced dataset, we test SMOTE oversampling the minority class for the best-performing descriptors the Mordred Molecular descriptors.

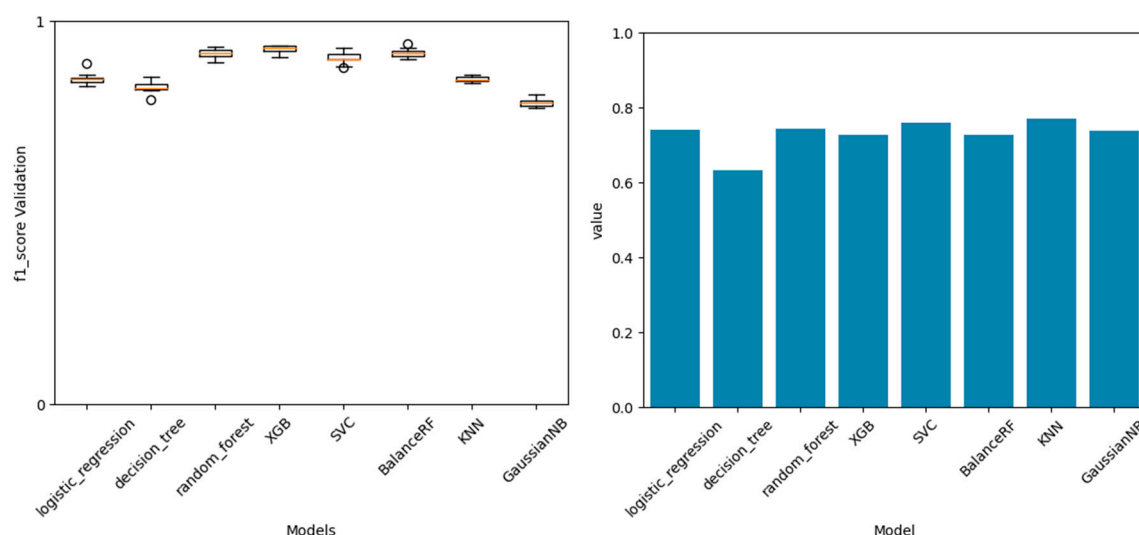

Figure S5: These figures show a comparison of different ML models evaluated on an external test set.

*Increased Mitochondrial dysfunction*

Start calculation: XGBclassifier

Best hyperparameters: {'colsample\_bytree': 1.0, 'learning\_rate': 0.5, 'max\_depth': 5, 'n\_estimators': 200, 'subsample': 1.0}

balanced\_accuracy, 0.922

Total time taken: 216 minutes

Results External test set -----

{'Balance Accuracy': 0.747, 'Precision': 0.615, 'Sensitivity': 0.610, 'Specificity': 0.887, 'MCC': 0.497, 'f1': 0.612}

-----  
Number of preds: 1001

Active preds: 226

## Section S2: Deep Learning Models

### 2.1. Deep Neural Network

We built a simple Dense architecture to predict the mitochondrial toxicity on different chemical representations:

- Morgan circular fingerprint
- MACCs fingerprint
- CDDD descriptors
- Molecular Descriptors

The architecture is the same for each DNN, we choose the same for all descriptors to be able to better compare which of these chemical representations could be the best for our aims. The only difference is regarding the input layers whose dimensions depend on the features of the fingerprint, such as the *bin number*.

| Layer (type)                                | Output Shape          | Param # |
|---------------------------------------------|-----------------------|---------|
| FP_inputs (InputLayer)                      | [(None, shape_input)] | 0       |
| dense_16 (Dense)                            | (None, 232)           | 119016  |
| batch_normalization_6 (Batch Normalization) | (None, 232)           | 928     |
| dropout_10 (Dropout)                        | (None, 232)           | 0       |
| batch_normalization_7 (Batch Normalization) | (None, 232)           | 928     |
| dense_17 (Dense)                            | (None, 128)           | 29824   |
| dropout_11 (Dropout)                        | (None, 128)           | 0       |
| batch_normalization_8 (Batch Normalization) | (None, 128)           | 512     |

hNormalization)

|                  |            |      |
|------------------|------------|------|
| dense_18 (Dense) | (None, 64) | 8256 |
|------------------|------------|------|

|                      |            |   |
|----------------------|------------|---|
| dropout_12 (Dropout) | (None, 64) | 0 |
|----------------------|------------|---|

|                  |           |    |
|------------------|-----------|----|
| dense_19 (Dense) | (None, 1) | 65 |
|------------------|-----------|----|

=====

Total params: 159,529

Trainable params: 158,345

Non-trainable params: 1,184

---

## 2.2 Neural Language Process

We have developed a model capable of predicting chemical toxicity directly from SMILES representations. It is possible to represent SMILES in a suitable format for layers typically used in NLP such as LSTM or GRU. For this purpose, we have to define the vocabulary of characters and perform text vectorization on the characters that compose SMILES.

This representation is used to create a character-level embedding where the model learns from data during optimization the best way to describe the character. For instance, figure S4 reported an example of embedding used in our models for calculating a specific molecule.

```

Charified text:
C N 1 C C N ( C ( = O ) O c 2 c 3 n c c n c 3 c ( O ) n 2 - c 2 c c c ( C 1 ) c n 2 ) C C 1

Length of random_train_chars: 46

Vectorized chars:
[[ 2 10 7 2 2 10 5 2 5 8 6 4 6 3 9 3 12 11 3 3 11 3 12 3
  5 6 4 11 9 18 3 9 3 3 3 5 2 15 4 3 11 9 4 2 2 7 0 0
  0 0 0 0 0 0 0 0 0 0 0 0 0 0 0 0 0 0 0 0 0 0 0
  0 0 0 0 0 0 0 0 0 0 0 0 0 0 0 0 0 0 0 0 0 0
  0 0 0 0 0 0 0 0 0 0 0 0 0 0 0 0 0 0 0]]

Length of Vectorized chars: 111
Charified text:1n C N 1 C C N ( C ( = O ) O c 2 c 3 n c c n c 3 c ( O ) n 2 - c 2 c c c ( C 1 ) c n 2 ) C C 1

Embedding:
[[[ 0.0025637  0.03526796 -0.02779629 ...  0.0060787  0.03064049
    -0.03925943]
  [-0.04418314  0.01262743 -0.00675542 ... -0.0131175  -0.03927482
    0.03514269]
  [-0.01162801 -0.03018752 -0.02386877 ...  0.03255202 -0.00092153
    -0.03525937]
  ...
  [ 0.02574723  0.03190776  0.00656862 ... -0.02340719 -0.02407622
    -0.0059273 ]
  [ 0.02574723  0.03190776  0.00656862 ... -0.02340719 -0.02407622
    -0.0059273 ]
  [ 0.02574723  0.03190776  0.00656862 ... -0.02340719 -0.02407622
    -0.0059273 ]]]

Character embedding shape: (1, 111, 264)

```

Figure S6: the image shows an example of the embedding process result done on SMILES.

Using this numerical representation an AI model with convolution and long-short-term memory (LSTM) bidirectional layers is trained.

Model architecture:

| Layer (type)                        | Output Shape     | Param # |
|-------------------------------------|------------------|---------|
| inputs_smiles_as_char (InputLayer)  | [(None, 1)]      | 0       |
| char_vectorizer (TextVectorization) | (None, 111)      | 0       |
| char_embed (Embedding)              | (None, 111, 264) | 7392    |
| conv1d (Conv1D)                     | (None, 111, 128) | 169088  |
| conv1d_1 (Conv1D)                   | (None, 111, 64)  | 41024   |
| bidirectional (Bidirectional)       | (None, 111, 128) | 66048   |
| bidirectional_1 (Bidirectional)     | (None, 111, 64)  | 31104   |

nal)

|                                           |            |      |
|-------------------------------------------|------------|------|
| global_max_pooling1d (GlobalMaxPooling1D) | (None, 64) | 0    |
| dense (Dense)                             | (None, 64) | 4160 |
| dropout (Dropout)                         | (None, 64) | 0    |
| dense_1 (Dense)                           | (None, 32) | 2080 |
| dropout_1 (Dropout)                       | (None, 32) | 0    |
| dense_2 (Dense)                           | (None, 16) | 528  |
| dense_3 (Dense)                           | (None, 1)  | 17   |

=====  
Total params: 321,441

Trainable params: 321,441

Non-trainable params: 0

## 2.3 Graph Neural Networks

Graph Neural Networks (GNNs) are a specialized type of neural network designed to learn from graph-structured data. In the context of chemistry, GNNs can be utilized to predict chemical properties by representing molecules as graphs. In this representation, each node in the graph corresponds to an atom, while each edge represents a chemical bond between the atoms. By leveraging GNNs, information can be efficiently propagated through the graph, effectively considering the relationships between the entities (atoms and bonds). The motivation for using this representation is because molecules are naturally represented as an undirected graph  $G = (V, E)$ , where  $V$  is a set of vertices (nodes; atoms) and  $E$  a set of edges (bonds), GNNs (such as MPNN) are proving to be a useful method for predicting molecular properties.

This representation proves to be highly suitable for AI and ML applications, particularly due to the matrices that represent the graph's information, including the adjacency matrix, node features matrix, and bond features matrix. These matrices enable efficient processing and utilization of graph-based data, making GNNs a powerful tool for analyzing and predicting properties of chemical compounds.

One of the architectures we are going to use is a type of graph neural network (GNN) known as a message-passing neural network (MPNN) to predict graph properties.

GraphMMNN

| Layer (type)                                            | Output Shape | Param # | Connected to                                                               |
|---------------------------------------------------------|--------------|---------|----------------------------------------------------------------------------|
| atom_features (InputLayer)                              | [(None, 29)] | 0       | []                                                                         |
| bond_features (InputLayer)                              | [(None, 7)]  | 0       | []                                                                         |
| pair_indices (InputLayer)                               | [(None, 2)]  | 0       | []                                                                         |
| message_passing (MessagePassing)                        | (None, 32)   | 14528   | ['atom_features[0][0]',<br>'bond_features[0][0]',<br>'pair_indices[0][0]'] |
| molecule_indicator (InputLayer)                         | [(None,)]    | 0       | []                                                                         |
| transformer_encoder_readout (TransformerEncoderReadout) | (None, 32)   | 67008   | ['message_passing[0][0]',<br>'molecule_indicator[0][0]']                   |
| dense_26 (Dense)                                        | (None, 512)  | 16896   | ['transformer_encoder_readout[0][0]']                                      |
| dropout_16 (Dropout)                                    | (None, 512)  | 0       | ['dense_26[0][0]']                                                         |
| dense_27 (Dense)                                        | (None, 256)  | 131328  | ['dropout_16[0][0]']                                                       |
| dropout_17 (Dropout)                                    | (None, 256)  | 0       | ['dense_27[0][0]']                                                         |
| dense_28 (Dense)                                        | (None, 128)  | 32896   | ['dropout_17[0][0]']                                                       |
| dropout_18 (Dropout)                                    | (None, 128)  | 0       | ['dense_28[0][0]']                                                         |
| dense_29 (Dense)                                        | (None, 64)   | 8256    | ['dropout_18[0][0]']                                                       |
| dropout_19 (Dropout)                                    | (None, 64)   | 0       | ['dense_29[0][0]']                                                         |
| dense_30 (Dense)                                        | (None, 32)   | 2080    | ['dropout_19[0][0]']                                                       |
| dropout_20 (Dropout)                                    | (None, 32)   | 0       | ['dense_30[0][0]']                                                         |
| dense_31 (Dense)                                        | (None, 1)    | 33      | ['dropout_20[0][0]']                                                       |



---

---

Total params: 273,025

Trainable params: 273,025

Non-trainable params: 0

## 2.4 Multimodal

### Architecture Multimodal Neural Network

| Layer (type)                                | Output Shape     | Param # | Connected to                     |
|---------------------------------------------|------------------|---------|----------------------------------|
| inputs_smiles_as_char (InputLayer)          | [(None, 1)]      | 0       | []                               |
| char_vectorizer (TextVectorization)         | (None, 111)      | 0       | ['inputs_smiles_as_char[0][0]']  |
| char_embed (Embedding)                      | (None, 111, 264) | 7392    | ['char_vectorizer[0][0]']        |
| conv1d_2 (Conv1D)                           | (None, 111, 128) | 169088  | ['char_embed[0][0]']             |
| conv1d_3 (Conv1D)                           | (None, 111, 64)  | 41024   | ['conv1d_2[0][0]']               |
| bidirectional_2 (Bidirectional)             | (None, 111, 128) | 66048   | ['conv1d_3[0][0]']               |
| bidirectional_3 (Bidirectional)             | (None, 111, 64)  | 31104   | ['bidirectional_2[0][0]']        |
| global_max_pooling1d_1 (GlobalMaxPooling1D) | (None, 64)       | 0       | ['bidirectional_3[0][0]']        |
| CFP_inputs (InputLayer)                     | [(None, 1024)]   | 0       | []                               |
| MACCs_inputs (InputLayer)                   | [(None, 167)]    | 0       | []                               |
| CDDD_inputs (InputLayer)                    | [(None, 512)]    | 0       | []                               |
| MD_inputs (InputLayer)                      | [(None, 399)]    | 0       | []                               |
| dense_19 (Dense)                            | (None, 64)       | 4160    | ['global_max_pooling1d_1[0][0]'] |

|                                              |             |        |                                  |
|----------------------------------------------|-------------|--------|----------------------------------|
| dense_22 (Dense)                             | (None, 128) | 131200 | ['CFP_inputs[0][0]']             |
| dense_25 (Dense)                             | (None, 128) | 21504  | ['MACCs_inputs[0][0]']           |
| dense_28 (Dense)                             | (None, 128) | 65664  | ['CDDD_inputs[0][0]']            |
| dense_31 (Dense)                             | (None, 128) | 51200  | ['MD_inputs[0][0]']              |
| batch_normalization_12 (Batch Normalization) | (None, 64)  | 256    | ['dense_19[0][0]']               |
| batch_normalization_14 (Batch Normalization) | (None, 128) | 512    | ['dense_22[0][0]']               |
| batch_normalization_16 (Batch Normalization) | (None, 128) | 512    | ['dense_25[0][0]']               |
| batch_normalization_18 (Batch Normalization) | (None, 128) | 512    | ['dense_28[0][0]']               |
| batch_normalization_20 (Batch Normalization) | (None, 128) | 512    | ['dense_31[0][0]']               |
| dropout_12 (Dropout)                         | (None, 64)  | 0      | ['batch_normalization_12[0][0]'] |
| dropout_14 (Dropout)                         | (None, 128) | 0      | ['batch_normalization_14[0][0]'] |
| dropout_16 (Dropout)                         | (None, 128) | 0      | ['batch_normalization_16[0][0]'] |
| dropout_18 (Dropout)                         | (None, 128) | 0      | ['batch_normalization_18[0][0]'] |
| dropout_20 (Dropout)                         | (None, 128) | 0      | ['batch_normalization_20[0][0]'] |
| dense_20 (Dense)                             | (None, 32)  | 2080   | ['dropout_12[0][0]']             |
| dense_23 (Dense)                             | (None, 64)  | 8256   | ['dropout_14[0][0]']             |
| dense_26 (Dense)                             | (None, 64)  | 8256   | ['dropout_16[0][0]']             |
| dense_29 (Dense)                             | (None, 64)  | 8256   | ['dropout_18[0][0]']             |

|                                              |             |      |                                                                                                        |
|----------------------------------------------|-------------|------|--------------------------------------------------------------------------------------------------------|
| dense_32 (Dense)                             | (None, 64)  | 8256 | ['dropout_20[0][0]']                                                                                   |
| batch_normalization_13 (Batch Normalization) | (None, 32)  | 128  | ['dense_20[0][0]']                                                                                     |
| batch_normalization_15 (Batch Normalization) | (None, 64)  | 256  | ['dense_23[0][0]']                                                                                     |
| batch_normalization_17 (Batch Normalization) | (None, 64)  | 256  | ['dense_26[0][0]']                                                                                     |
| batch_normalization_19 (Batch Normalization) | (None, 64)  | 256  | ['dense_29[0][0]']                                                                                     |
| batch_normalization_21 (Batch Normalization) | (None, 64)  | 256  | ['dense_32[0][0]']                                                                                     |
| dropout_13 (Dropout)                         | (None, 32)  | 0    | ['batch_normalization_13[0][0]']                                                                       |
| dropout_15 (Dropout)                         | (None, 64)  | 0    | ['batch_normalization_15[0][0]']                                                                       |
| dropout_17 (Dropout)                         | (None, 64)  | 0    | ['batch_normalization_17[0][0]']                                                                       |
| dropout_19 (Dropout)                         | (None, 64)  | 0    | ['batch_normalization_19[0][0]']                                                                       |
| dropout_21 (Dropout)                         | (None, 64)  | 0    | ['batch_normalization_21[0][0]']                                                                       |
| dense_21 (Dense)                             | (None, 16)  | 528  | ['dropout_13[0][0]']                                                                                   |
| dense_24 (Dense)                             | (None, 64)  | 4160 | ['dropout_15[0][0]']                                                                                   |
| dense_27 (Dense)                             | (None, 64)  | 4160 | ['dropout_17[0][0]']                                                                                   |
| dense_30 (Dense)                             | (None, 64)  | 4160 | ['dropout_19[0][0]']                                                                                   |
| dense_33 (Dense)                             | (None, 64)  | 4160 | ['dropout_21[0][0]']                                                                                   |
| multimodal_inputs (Concatenate)              | (None, 272) | 0    | ['dense_21[0][0]',<br>'dense_24[0][0]',<br>'dense_27[0][0]',<br>'dense_30[0][0]',<br>'dense_33[0][0]'] |

|                                              |            |      |                                  |
|----------------------------------------------|------------|------|----------------------------------|
| dense_35 (Dense)                             | (None, 32) | 8736 | ['multimodal_inputs[0][0]']      |
| batch_normalization_23 (Batch Normalization) | (None, 32) | 128  | ['dense_35[0][0]']               |
| dropout_23 (Dropout)                         | (None, 32) | 0    | ['batch_normalization_23[0][0]'] |
| dense_36 (Dense)                             | (None, 16) | 528  | ['dropout_23[0][0]']             |
| dense_37 (Dense)                             | (None, 1)  | 17   | ['dense_36[0][0]']               |

Total params: 653,521  
Trainable params: 651,729  
Non-trainable params: 1,792

Section S3: Results for split 80 – 20 and 70 – 30 KE2 and experimental summary.

Table S1: split 80-20 modeling results.

|                                                                      | Test set         |           |             |             |       |          | Training set     | Encoder                                           |
|----------------------------------------------------------------------|------------------|-----------|-------------|-------------|-------|----------|------------------|---------------------------------------------------|
|                                                                      | Balance Accuracy | Precision | Sensitivity | Specificity | MCC   | F1-Score | Balance Accuracy |                                                   |
| <i>DNN_CircularFingerprint</i>                                       | 0.673            | 0.413     | 0.600       | 0.746       | 0.309 | 0.489    | 0.879            | <i>Circular Fingerprint</i>                       |
| <i>DNN_MACCs</i>                                                     | 0.734            | 0.459     | 0.722       | 0.746       | 0.410 | 0.561    | 0.755            | <i>MACCs fingerprint</i>                          |
| <i>DNN_CDDD</i>                                                      | 0.768            | 0.492     | 0.774       | 0.762       | 0.469 | 0.601    | 0.852            | <i>Latent representation CDDD</i>                 |
| <i>DNN_MolecularDescriptors</i>                                      | 0.773            | 0.468     | 0.826       | 0.720       | 0.468 | 0.597    | 0.818            | <i>Molecular Descriptors</i>                      |
| <i>MPNN</i>                                                          | 0.726            | 0.518     | 0.626       | 0.826       | 0.425 | 0.567    | 0.749            | <i>Graph</i>                                      |
| <i>NLP_charsEmbedding</i>                                            | 0.712            | 0.532     | 0.574       | 0.850       | 0.413 | 0.552    | 0.736            | <i>Text Vectorization and character embedding</i> |
| <i>NLP_charsEmbeddingAugmented</i>                                   | 0.733            | 0.586     | 0.591       | 0.876       | 0.466 | 0.589    | 0.792            | <i>Text Vectorization and character embedding</i> |
| <b>Multimodal</b>                                                    | 0.781            | 0.520     | 0.774       | 0.788       | 0.498 | 0.622    | 0.878            | <i>All (no graph)</i>                             |
| <i>Extreme Gradient Boosting (best ML with oversampling methods)</i> | 0.747            | 0.615     | 0.607       | 0.887       | 0.500 | 0.611    | 0.922            | <i>Latent Description CDDD</i>                    |

Table S2: split 70-30 modeling results.

|                                                                             | Test set         |           |             |             |       |          | Training set     |                                                   |
|-----------------------------------------------------------------------------|------------------|-----------|-------------|-------------|-------|----------|------------------|---------------------------------------------------|
|                                                                             | Balance Accuracy | Precision | Sensitivity | Specificity | MCC   | F1-Score | Balance Accuracy | Encoder                                           |
| <i>DNN_CircularFingerprint</i>                                              | 0.725            | 0.525     | 0.616       | 0.834       | 0.427 | 0.567    | 0.880            | <i>Circular Fingerprint</i>                       |
| <i>DNN_MACCs</i>                                                            | 0.736            | 0.438     | 0.762       | 0.710       | 0.405 | 0.556    | 0.756            | <i>MACCs fingerprint</i>                          |
| <i>DNN_CDDD</i>                                                             | 0.796            | 0.564     | 0.767       | 0.824       | 0.536 | 0.650    | 0.846            | <i>Latent representation CDDD</i>                 |
| <i>DNN_MolecularDescriptors</i>                                             | 0.789            | 0.511     | 0.808       | 0.770       | 0.506 | 0.626    | 0.817            | <i>Molecular Descriptors</i>                      |
| <i>MPNN</i>                                                                 | 0.760            | 0.543     | 0.692       | 0.827       | 0.480 | 0.609    | 0.736            | <i>Graph</i>                                      |
| <i>NLP_charsEmbedding</i>                                                   | 0.762            | 0.538     | 0.703       | 0.820       | 0.481 | 0.610    | 0.822            | <i>Text Vectorization and character embedding</i> |
| <i>NLP_charsEmbeddingAugmented</i>                                          | 0.759            | 0.555     | 0.680       | 0.838       | 0.484 | 0.611    | 0.900            | <i>Text Vectorization and character embedding</i> |
| <i>Multimodal</i>                                                           | 0.743            | 0.496     | 0.698       | 0.789       | 0.438 | 0.580    | 0.858            | <i>All (no graph)</i>                             |
| <b><i>Extreme Gradient Boosting (best ML with oversampling methods)</i></b> | 0.758            | 0.626     | 0.628       | 0.889       | 0.516 | 0.627    | 0.922            | <i>Latent Description CDDD</i>                    |

Table S3: Experimental summary

|                                              |                                                                                                       |                            |                                 | SPLIT % |       |               | OVERSAMPLING |                  |          |        |
|----------------------------------------------|-------------------------------------------------------------------------------------------------------|----------------------------|---------------------------------|---------|-------|---------------|--------------|------------------|----------|--------|
|                                              | Dataset                                                                                               | Encoders                   | Models                          | 70-30   | 80-20 | 90-10         | SMOTE        | BORDERLINE SMOTE | SVMSMOTE | ADASYN |
| Machine Learning                             | Inhibition Mitochondrial complexes, Increase Oxidative Stress and Increased Mitochondrial dysfunction | Circular Fingerprint       | Logistic Regression             | KE2     | KE2   | all endpoints |              |                  |          |        |
|                                              |                                                                                                       |                            | Decision Tree                   | KE2     | KE2   | all endpoints |              |                  |          |        |
|                                              |                                                                                                       |                            | Random Forest                   | KE2     | KE2   | all endpoints |              |                  |          |        |
|                                              |                                                                                                       |                            | Extreme Gradient Boosting       | KE2     | KE2   | all endpoints |              |                  |          |        |
|                                              |                                                                                                       |                            | Support Vector Machine          | KE2     | KE2   | all endpoints |              |                  |          |        |
|                                              |                                                                                                       |                            | Balance Random Forest           | KE2     | KE2   | all endpoints |              |                  |          |        |
|                                              |                                                                                                       |                            | k-nearest neighbors             | KE2     | KE2   | all endpoints |              |                  |          |        |
|                                              |                                                                                                       |                            | Gaussian Naive Bayes            | KE2     | KE2   | all endpoints |              |                  |          |        |
|                                              |                                                                                                       | MACCs fingerprint          | Logistic Regression             | KE2     | KE2   | all endpoints |              |                  |          |        |
|                                              |                                                                                                       |                            | Decision Tree                   | KE2     | KE2   | all endpoints |              |                  |          |        |
|                                              |                                                                                                       |                            | Random Forest                   | KE2     | KE2   | all endpoints |              |                  |          |        |
|                                              |                                                                                                       |                            | Extreme Gradient Boosting       | KE2     | KE2   | all endpoints |              |                  |          |        |
|                                              |                                                                                                       |                            | Support Vector Machine          | KE2     | KE2   | all endpoints |              |                  |          |        |
|                                              |                                                                                                       |                            | Balance Random Forest           | KE2     | KE2   | all endpoints |              |                  |          |        |
|                                              |                                                                                                       |                            | k-nearest neighbors             | KE2     | KE2   | all endpoints |              |                  |          |        |
|                                              |                                                                                                       |                            | Gaussian Naive Bayes            | KE2     | KE2   | all endpoints |              |                  |          |        |
|                                              |                                                                                                       | Molecular Descriptors      | Logistic Regression             | KE2     | KE2   | all endpoints | x            | x                | x        | x      |
|                                              |                                                                                                       |                            | Decision Tree                   | KE2     | KE2   | all endpoints | x            |                  |          |        |
|                                              |                                                                                                       |                            | Random Forest                   | KE2     | KE2   | all endpoints | x            |                  |          |        |
|                                              |                                                                                                       |                            | Extreme Gradient Boosting       | KE2     | KE2   | all endpoints | x            |                  |          |        |
|                                              |                                                                                                       |                            | Support Vector Machine          | KE2     | KE2   | all endpoints | x            |                  |          |        |
|                                              |                                                                                                       |                            | Balance Random Forest           | KE2     | KE2   | all endpoints | x            |                  |          |        |
|                                              |                                                                                                       |                            | k-nearest neighbors             | KE2     | KE2   | all endpoints | x            | x                | x        | x      |
|                                              |                                                                                                       |                            | Gaussian Naive Bayes            | KE2     | KE2   | all endpoints | x            |                  |          |        |
|                                              |                                                                                                       | Latent representation CDDD | Logistic Regression             | KE2     | KE2   | all endpoints |              |                  |          |        |
|                                              |                                                                                                       |                            | Decision Tree                   | KE2     | KE2   | all endpoints |              |                  |          |        |
|                                              |                                                                                                       |                            | Random Forest                   | KE2     | KE2   | all endpoints |              |                  |          |        |
|                                              |                                                                                                       |                            | Extreme Gradient Boosting       | KE2     | KE2   | all endpoints |              |                  |          |        |
|                                              |                                                                                                       |                            | Support Vector Machine          | KE2     | KE2   | all endpoints |              |                  |          |        |
|                                              |                                                                                                       |                            | Balance Random Forest           | KE2     | KE2   | all endpoints |              |                  |          |        |
|                                              |                                                                                                       |                            | k-nearest neighbors             | KE2     | KE2   | all endpoints |              |                  |          |        |
|                                              |                                                                                                       |                            | Gaussian Naive Bayes            | KE2     | KE2   | all endpoints |              |                  |          |        |
| Artificial Intelligence Deep Neural Networks | Increased Mitochondrial dysfunction                                                                   | Circular Fingerprint       | Deep Neural Network             | KE2     | KE2   | KE2           |              |                  |          |        |
|                                              |                                                                                                       | MACCs fingerprint          | Deep Neural Network             | KE2     | KE2   | KE2           |              |                  |          |        |
|                                              |                                                                                                       | Molecular Descriptors      | Deep Neural Network             | KE2     | KE2   | KE2           |              |                  |          |        |
|                                              |                                                                                                       | Graph                      | Message Passing Neural Networks | KE2     | KE2   | KE2           |              |                  |          |        |
|                                              |                                                                                                       | charsEmbedding             | Neural Language Processing      | KE2     | KE2   | KE2           |              |                  |          |        |
|                                              |                                                                                                       | charsEmbeddingAugmented    | Neural Language Processing      | KE2     | KE2   | KE2           |              |                  |          |        |
|                                              |                                                                                                       | Latent representation CDDD | Deep Neural Network             | KE2     | KE2   | KE2           |              |                  |          |        |
|                                              |                                                                                                       | All(no graph)              | Multimodal                      | KE2     | KE2   | KE2           |              |                  |          |        |

Section S4: Indices used to evaluate the models.

- Precision:

$$Precision = \frac{True\ Positive}{True\ Positive + False\ Positive}$$

- Sensitivity:

$$Sensitivity = \frac{True\ Positive}{True\ Positive + False\ Negative}$$

- Specificity:

$$Specificity = \frac{True\ Negative}{True\ Negative + False\ Positive}$$

- Balance Accuracy:

$$\text{Balance Accuracy} = \frac{\text{Sensitivity} + \text{Specificity}}{2}$$

- F1-score: is the harmonic mean of the precision and recall. It thus symmetrically represents both precision and recall in one metric.

$$F1 - \text{score} = 2 * \frac{\text{Precision} * \text{Recall}}{\text{Precision} + \text{Recall}}$$

- Accuracy: shows how often a classification ML model is correct overall

$$\text{Accuracy} = \frac{\text{True Positive} + \text{True Negative}}{\text{True Positive} + \text{False Positive} + \text{True Negative} + \text{False Negative}}$$

- Matthew Correlation Coefficient:

True Positive = TP

True Negative = TN

False Positive = FP

False Negative = FN

$$MCC = \frac{(TP * TN) * (FP * FN)}{\sqrt{(TP + FP) * (TP + FN) * (TN + FP) * (TN + FN)}}$$

## Section S5: Data distribution comparison



## MIE: Inhibition of mitochondrial complexes

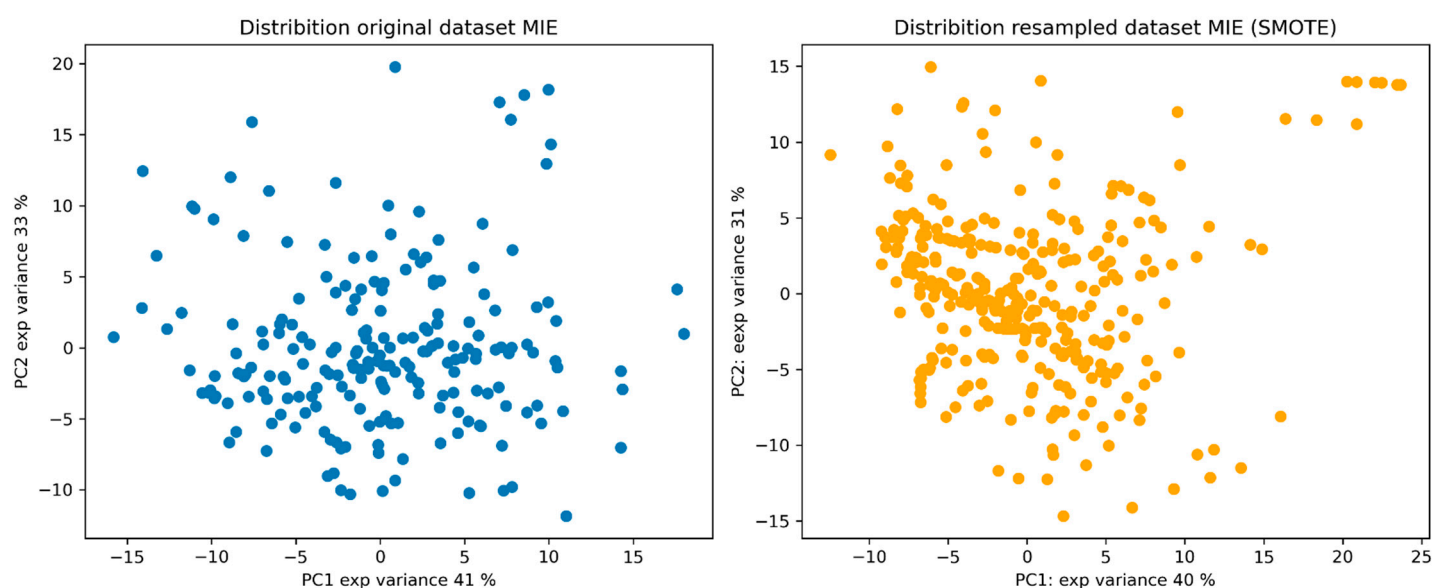

Figure S7: A comparison of the original data distribution for the "Inhibition of Mitochondrial Complexes" endpoint and the data generated by SMOTE methods. The data are plotted in principal component space.

PC1

Kolmogorov-Smirnov Statistic: 0.083

P-value: 0.316

No significant difference observed.

## KE1: Increase Oxidative Stress

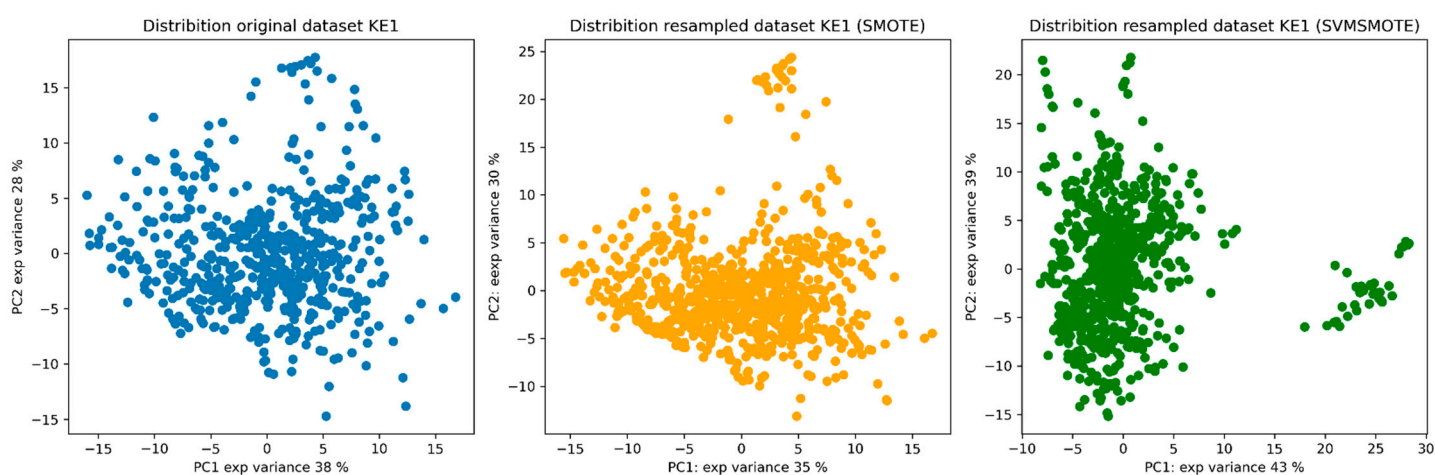

Figure S8: A comparison of the original data distribution for the " Increase Oxidative Stress " endpoint and the data generated by SMOTE and SVMSMOTEmethods. The data are plotted in principal component space.

PC1:

SMOTE-----

Kolmogorov-Smirnov Statistic: 0.0313

P-value: 0.885 No significant difference observed.

SVMSMOTE-----

Kolmogorov-Smirnov Statistic: 0.247

P-value: 2.10e-18 The distributions are significantly different.

## KE2: Mitochondrial Dysfunction

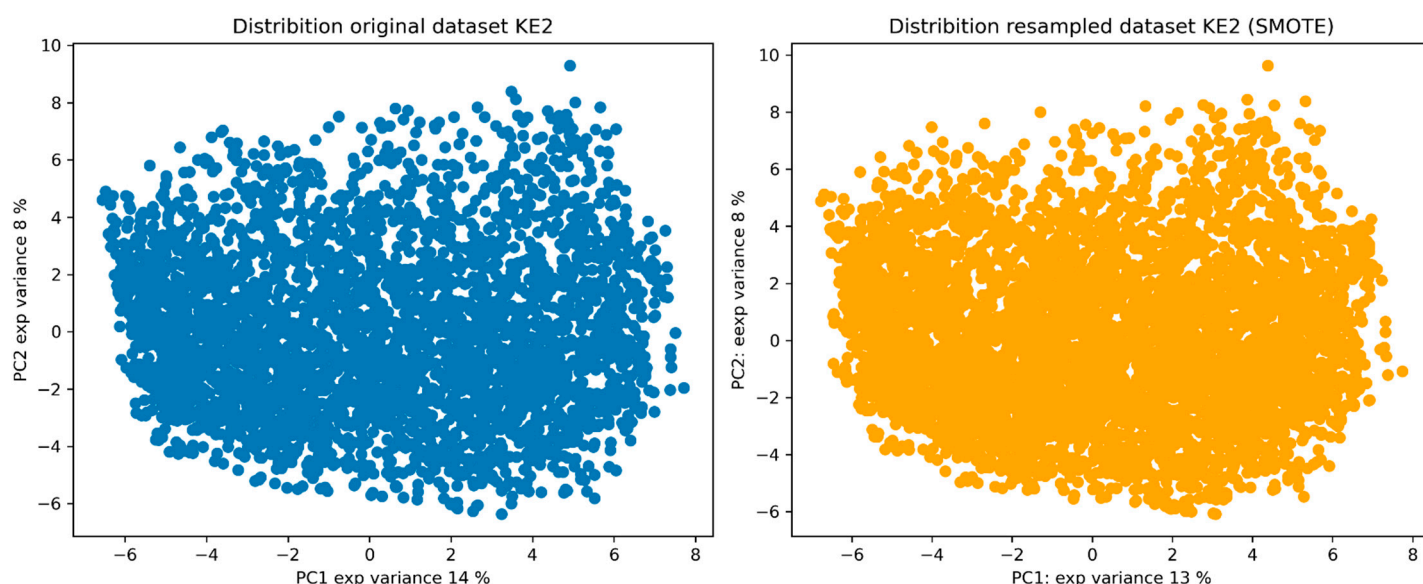

Figure S9: A comparison of the original data distribution for the " Mitochondrial Dysfunction " endpoint and the data generated by SMOTE methods. The data are plotted in principal component space.

PC1

Kolmogorov-Smirnov Statistic: 0.0234

P-value: 0.136

No significant difference observed.
